# Supplementary material for: Metabolic profiling reveals coordinated switches in primary carbohydrate metabolism in grape berry (Vitis vinifera L.), a non-climacteric fleshy fruit
Source: PubMed Central journal article supplement — J Exp Bot. 2013 Jan 30;64(5):1345–55. doi: 10.1093/jxb/ers396 (PMC3598422; doi:10.1093/jxb/ers396), 2013-01-30
Supplement: supp_ers396_jexbot090167_file001.pdf [file supp_ers396_jexbot090167_file001.pdf]

**Supplementary Data**

**Developmental regulation of primary carbohydrate metabolism in  
grape berry (*Vitis vinifera* L.) cv. Cabernet Sauvignon**

**Zhan Wu Dai, Céline Léon, Regina Feil, John E. Lunn, Serge Delrot, Eric  
Gomès**

**Table S1.** List of the 27 measured metabolites and their abbreviations.

| <b>Name</b>                 | <b>Abbreviation</b> |
|-----------------------------|---------------------|
| Sucrose                     | sucrose             |
| Glucose                     | glucose             |
| Fructose                    | fructose            |
| Sucrose 6-phosphate         | S6P                 |
| Glucose 6-phosphate         | G6P                 |
| Fructose 6-phosphate        | F6P                 |
| Glucose 1-phosphate         | G1P                 |
| Fructose 1-phosphate        | F1P                 |
| Mannose-6-phosphate         | M6P                 |
| Uridine diphosphate glucose | UDPG                |
| Adenosine diphosphoglucose  | ADPG                |
| Phosphoenolpyruvate         | PEP                 |
| Fructose 1,6-bisphosphate   | F1,6BP              |
| Pyruvate                    | pyruvate            |
| 3-Phospho-D-glycerate       | PGA                 |
| citrate                     | citrate             |
| Aconitate                   | aconitate           |
| Isocitrate                  | Isocitrate          |
| 2-Oxoglutarate              | 2-Oxoglutarate      |
| Succinate                   | succinate           |
| Fumarate                    | fumarate            |
| Malate                      | malate              |
| Tartrate                    | tartrate            |
| Glycerol 3-phosphate        | Gly3P               |
| shikimate                   | shikimate           |
| Glycerate                   | Glycerate           |
| Trehalose-6-phosphate       | T6P                 |

**Table S2.** Developmental changes in primary metabolite levels in climacteric and non-climacteric fleshy fruits. Metabolite profiles from the current study of developing grape berries are compared with published data from grape, and with data from other non-climacteric fleshy fruits (strawberry and citrus) and from climacteric fruits (tomato and peach). For all species, two distinct phases of fruit development are apparent: the early stages when fruits are hard and acidic (in green) and the ripening stages where fruits become softer and rich in sugars (in red). The bottom panel shows the coverage of the metabolites of interest in each study and the analytical method used to measure the metabolites.

| Pathway metabolites | Non-climacteric fleshy fruit       |                                   |                                                                           |                                                                     |                                          | Climacteric fleshy fruit   |                                                                                    |                             |                     |
|---------------------|------------------------------------|-----------------------------------|---------------------------------------------------------------------------|---------------------------------------------------------------------|------------------------------------------|----------------------------|------------------------------------------------------------------------------------|-----------------------------|---------------------|
|                     | Grape<br><i>Vitis vinifera</i> L.  |                                   | Strawberry<br><i>Fragaria x ananassa</i> Duch.<br>cv. Herut<br>receptacle | Citrus<br><i>Citrus sinensis</i> L.<br>cv. Washington<br>juice sacs | Tomato<br><i>Solanum lycopersicum</i> L. |                            | Peach<br><i>Prunus persica</i> (L.) Batsch<br>cv. Dixiland<br>whole fruit→mesocarp |                             |                     |
|                     | cv. Cabernet Sauvignon<br>pericarp | cv. Thompson Seedless<br>pericarp |                                                                           |                                                                     | cv. Trincadeira<br>whole berry           | cv. Moneymaker<br>pericarp | cv. Micro-Tom<br>pericarp                                                          | cv. Ailsa Craig<br>pericarp |                     |
| Glucose             |                                    |                                   |                                                                           |                                                                     |                                          |                            |                                                                                    |                             |                     |
| G6P                 |                                    |                                   |                                                                           |                                                                     |                                          |                            |                                                                                    |                             |                     |
| F6P                 |                                    |                                   |                                                                           |                                                                     |                                          |                            |                                                                                    |                             |                     |
| F1,6P2              |                                    |                                   |                                                                           |                                                                     |                                          |                            |                                                                                    |                             |                     |
| Glycolysis          |                                    |                                   |                                                                           |                                                                     |                                          |                            |                                                                                    |                             |                     |
| Gly3P               |                                    |                                   |                                                                           |                                                                     |                                          |                            |                                                                                    |                             |                     |
| 3-PGA               |                                    |                                   |                                                                           |                                                                     |                                          |                            |                                                                                    |                             |                     |
| 2-PGA               |                                    |                                   |                                                                           |                                                                     |                                          |                            |                                                                                    |                             |                     |
| PEP                 |                                    |                                   |                                                                           |                                                                     |                                          |                            |                                                                                    |                             |                     |
| Pyruvate            |                                    |                                   |                                                                           |                                                                     |                                          |                            |                                                                                    |                             |                     |
| Oxaloacetate        |                                    |                                   |                                                                           |                                                                     |                                          |                            |                                                                                    |                             |                     |
| Citrate             |                                    |                                   |                                                                           |                                                                     |                                          |                            |                                                                                    |                             |                     |
| Aconitate           |                                    |                                   |                                                                           |                                                                     |                                          |                            |                                                                                    |                             |                     |
| Isocitrate          |                                    |                                   |                                                                           |                                                                     |                                          |                            |                                                                                    |                             |                     |
| TCA cycle           |                                    |                                   |                                                                           |                                                                     |                                          |                            |                                                                                    |                             |                     |
| 2-Ketoglutarate     |                                    |                                   |                                                                           |                                                                     |                                          |                            |                                                                                    |                             |                     |
| SuCoA               |                                    |                                   |                                                                           |                                                                     |                                          |                            |                                                                                    |                             |                     |
| Succinate           |                                    |                                   |                                                                           |                                                                     |                                          |                            |                                                                                    |                             |                     |
| Fumarate            |                                    |                                   |                                                                           |                                                                     |                                          |                            |                                                                                    |                             |                     |
| Malate              |                                    |                                   |                                                                           |                                                                     |                                          |                            |                                                                                    |                             |                     |
| Glycolysis          | 77.8                               | 66.7                              | 11.1                                                                      | 33.3                                                                | 55.6                                     | 33.3                       | 11.1                                                                               | 11.1                        | 22.2                |
| TCA                 | 77.8                               | 33.3                              | 44.4                                                                      | 66.7                                                                | 77.8                                     | 77.8                       | 55.6                                                                               | 44.4                        | 44.4                |
| Global              | 77.8                               | 50                                | 27.8                                                                      | 50                                                                  | 66.7                                     | 55.6                       | 33.3                                                                               | 27.8                        | 33.3                |
| Method              | LC-MS                              | Enzymatic method                  | <sup>3</sup> H NMR                                                        | GC-MS                                                               | LC-MS/MS                                 | GC-MS                      | GC-MS                                                                              | GC-MS                       | GC-MS               |
| Ref                 | present work                       | Ruffner&Hawker,1977               | Ali etal 2011                                                             | Fait etal 2008                                                      | Katz etal 2011                           | Carrari etal 2006          | Yin etal 2010                                                                      | Osorio etal 2011            | Lombardo et al 2011 |

**Reference**

Ali, K., F. Maltese, A.M. Fortes, M.S. Pais, Y.H. Choi, and R. Verpoorte. 2011. *Food Chem.* 124: 1760-1769.  
 Carrari, F., C. Baxter, B. Usadel, E. Urbanczyk-Wochniak, M.-I. Zanor, A. Nunes-Nesi, V. Nikiforova, D. Centero, A. Ratzka, M. Pauly, L.J. Sweetlove, and A.R. Fernie. 2006. *Plant Physiol.* 142: 1380-1396.  
 Fait, A., K. Hanhineva, R. Beleggia, N. Dai, I. Rogachev, V.J. Nikiforova, A.R. Fernie, and A. Aharoni. 2008. *Plant Physiol.* 148: 730-750.  
 Katz, E., K.H. Boo, H.Y. Kim, R.A. Eigenheer, B.S. Phinney, V. Shulaev, F. Negre-Zakharov, A. Sadka, and E. Blumwald. 2011. *J. Exp. Bot.* 62: 5367-5384.  
 Lombardo, V.A., S. Osorio, J. Borsani, M.A. Lauxmann, C.A. Bustamante, C.O. Budde, C.S. Andreo, M.V. Lara, A.R. Fernie, and M.F. Drincovich. 2011. *Plant Physiol.* 157: 1696-1710.  
 Osorio, S., R. Alba, C.M.B. Damasceno, G. Lopez-Casado, M. Lohse, M.I. Zanor, T. Tohge, B. Usadel, J.K.C. Rose, Z. Fei, J.J. Giovannoni, and A.R. Fernie. 2011. *Plant Physiol.* 157: 405-425.  
 Ruffner, H.P., and J.S. Hawker. 1977. *Phytochemistry* 16: 1171-1175.  
 Yin, Y.-G., T. Tominaga, Y. Iijima, K. Aoki, D. Shibata, H. Ashihara, S. Nishimura, H. Ezura, and C. Matsukura. 2010. *Plant Cell Physiol.* 51: 1300-1314.

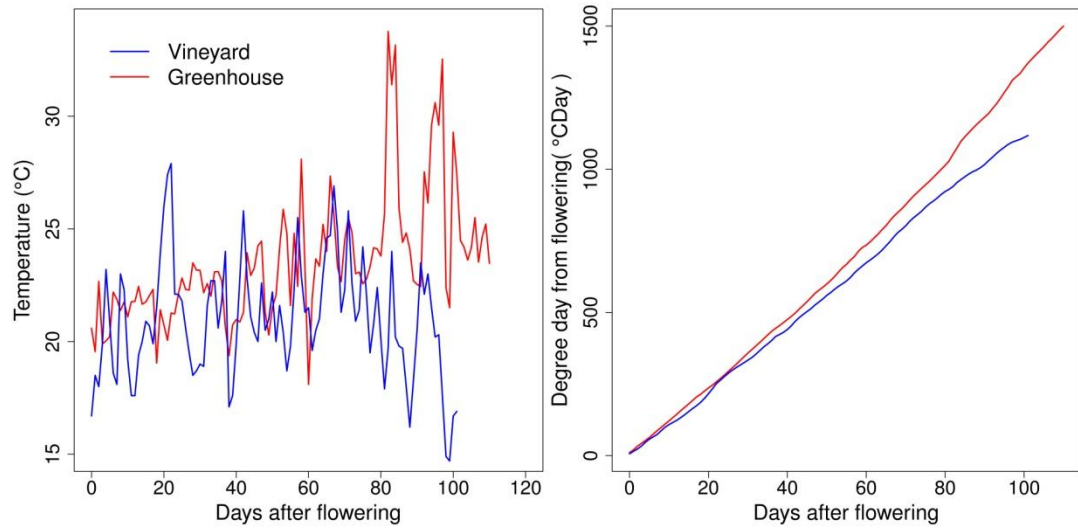

**Figure S1.** Daily temperature and sums of temperature ( $^{\circ}\text{Cday}$ : degree-days) from flowering to maturity in the vineyard and greenhouse. Greenhouse and vineyard had similar temperatures during the early developmental stages, but the greenhouse temperature was notably higher than in the vineyard during the final stages of development (from 80 to 110 DAF).
